# Supplementary material for: Bis(dioxaborine) compounds with large two-photon cross sections, and their use in the photodeposition of silver
Source: Royal Society of Chemistry journal article supplement (doi:10.1039/b303135g), 2003-01-01
Supplement: b303135g.doc [file b303135g.doc]

Supplementary information for:

**Bis-dioxaborine compounds with large two-photon cross sections, and their use in the photodeposition of silver**

**Marcus Halik, Wim Wenseleers, Cara Grasso, Francesco Stellacci, Egbert Zojer, Stephen Barlow, Jean-Luc Brédas, Joseph W. Perry and Seth R. Marder**

**Synthetic Procedures for New Compounds**

**2,7-Diacetyl-9,9-dipentyl-9*H*-fluorene.** 1-Bromopentane (28 mL, 0.22 mol), KOH (24 g), and water (8 mL) were added in that order to a solution of fluorene (12.0 g, 73 mmol) in DMSO (120 mL); after stirring for 72 h, water was added and the solution was extracted with diethyl ether (3  100 mL). The organic layer was washed with water (3  100 mL). The organic layer was dried with MgSO4 and the solvent was removed under reduced pressure. The crude 9,9-dipentyl-9*H*-fluorene was used without further purification in the next step.

Acetyl chloride (15.0 g, 191 mmol) was added slowly over 30 minutes to a suspension of AlCl3 (28.88 g, 217 mmol) and 1,2-dichloroethane (300 mL) at 5 ˚C. The crude 9,9-dipentyl-9*H*-fluorene was added slowly via syringe. The reaction mixture was stirred for 1 h at room temperature and then for 2 h at 40˚C; the reaction mixture was then added slowly to ice (ca. 500 cm3). Ten drops of concentrated HCl was then added. The organic layer was washed with water, 0.02 M NaOH, and again with water (200 mL). The solvent was removed under reduced pressure. Water and hexane (200 mL each) was added to the flask. The white solid was collected and was recrystallized from ethanol. Yield: 8.88 g (23 mmol, 32% from fluorene). 1H NMR (500 MHz, CDCl3) ** 8.00 (m, 4H, *J* = 1.5 Hz), 7.84 (dd, 2H, *J* = 6.8 and 1.5 Hz), 2.07 (s, 6H), 2.05 (m, 4H), 1.03 (m, 8H), 0.69 (t, 6H, 7.1 Hz), and 0.54 (m, 4H). 13C NMR (125 MHz, CDCl3)  198.0, 152.2, 144.5, 136.8, 128.2, 122.5, 120.5, 55.6, 40.0, 32.0, 26.9, 23.4, 22.2, Anal. Calc. for C27H34O2: C, 83.03, H, 8.77. Found: C, 83.29; H, 8.55.

**3,6-Diacetyl-9-(*n*-hexyl)-carbazole.** Acetyl chloride (15.1 g, 0.192 mol) was added slowly over 30 minutes to a suspension of AlCl3 (25.6 g, 0.192 mol) and 1,2-dichloroethane (200 mL) at 5 ˚C. 9-*n*-hexyl-carbazole (20.0 g, 0.080 mol) was then added slowly, and the reaction mixture was stirred for 2 h at room temperature and then for 2 h at 135 ˚C. After cooling, the solvent was removed under reduced pressure. Dilute HCl (400 mL) was added to the flask and a white solid formed. The white solid was collected by filtration and washed with water. The solid was recrystallized from ethanol (21.8 g, 82%). 1H-NMR (500 MHz, CDCl3) ** 8.79 (d, 2 H, *J* = 1.5 Hz), 8.18 (dd, 2 H, *J* = 1.5, 8.9 Hz), 7.45 (d, 2 H, *J* = 8.9 Hz), 4.34 (t, 2 H, *J* = 7.5 Hz), 2.75 (s, 6 H), 1.89 (m, 2 H), 1.32 (m, 6 H), 0.86 (t, 3 H, *J* = 7.5 Hz); 13C{1H}-NMR (125 MHz, CDCl3) ** 197.4, 143.9, 129.7, 127.0. 122.9, 122.0, 108.9, 43.6, 31.4, 31.4, 28.9, 26.8, 26.6, 22.4, 13.9. Anal. calc. for C22H25NO2: C, 78.77; H, 7.51; N, 4.18. Found: C, 78.64; H, 7.35; N, 4.10.

**Compounds 1-3**. Over a period of 4 h, the appropriate diacetyl conjugated molecule (10 mmol) was added to a stirred mixture of boron trifluoride acetic acid complex (40 mmol) and the appropriate carboxylic anhydride (120 mmol) at 60 ˚C. After a further 5-12 h at 60 ˚C, the mixture was allowed to cool and the resultant solid was collected by filtration, washed with acetic acid, ethyl acetate and ether, and then purified as described.

**1.** Yellow powder; 54% yield after column chromatography on silica gel with CH2Cl2 as eluant; 1H-NMR (CDCl3, 250 MHz**)** ** 8.18 (d, *J* = 8.6 Hz, 4H), 7.80 (d, *J* = 8.6 Hz, 4H), 6.61 (s, 2H), 2.64 (t, *J* = 7.5 Hz, 4H), 1.84 (sept, *J* = 7.5 Hz, 4H), 1.05 (t, *J* = 7.4 Hz, 6H); 1H-NMR (CD3SOCD3, 250 MHz**)** ** 8.33 (d, *J* = 8.5 Hz, 4H), 8.10 (d, *J* = 8.5 Hz, 4H), 6.61 (s, 2H), 2.72 (t, *J* = 7.4 Hz, 4H), 1.74 (sext, *J* = 7.4 Hz, 4H), 0.96 (t, *J* = 7.4 Hz, 6H); 13C{1H}-NMR (62.5 MHz, CD3SOCD3) ** 197.3, 180.6, 144.8, 130.8. 129.9, 128.1, 98.1, 39.0, 19.1, 13.4. HRMS calc. for C24H24B2F3O4 (M+-F) 455.1821. Found: 455.1828; Anal. calc. for C24H24B2F4O4: C, 60.81; H, 5.10. Found: C, 61.00; H, 5.10%.

**2.** Yellow powder; 31% after column chromatography on silica gel with 7:3 CH2Cl2 / hexanes as eluant, followed by recrystallization from acetic acid; 1H-NMR (CDCl3, 500 MHz) ** 8.11 (d, *J* = 1 Hz, 2 H), 8.09 (dd, *J* = 1, 8 Hz, 2H), 7.91 (d, *J* = 8 Hz, 2H), 6.64 (s, 2H), 2.66 (t, *J* = 7.5 Hz, 4H), 2.10 (m, 4H), 1.86 (sextet, *J* = 7.5 Hz, 4 H), 1.07 (m, 14H), 0.69 (t, *J* = 6.9 Hz, 6H), 0.48 (m, 4H); 13C{1H}-NMR (CDCl3, 125 MHz) ** 195.6, 182.3, 153.1, 146.2, 131.7, 128.7, 123.4, 121.5, 97.1, 56.2, 40.0, 39.9, 31.8, 23.4, 22.3, 19.7, 13.9, 13.7; HRMS calc. for C35H44B2F4O4 626.3374, found: 626.3369; Anal. Calc. for C35H44B2F4O4: C, 67.12, H, 7.08. Found: C, 66.98; H, 6.95.

**3.** Yellow solid, 11% after column chromatography on silica gel with CH2Cl2 as eluant (in this case, no precipitate was observed, so entire reaction mixture was chromotographed); 1H-NMR (CDCl3, 500 MHz) ** 8.80 (d, *J* = 2.0 Hz, 2H), 8.22 (dd, *J* = 2.0, 9.0 Hz, 2H), 7.51 (d, *J* = 9.0 Hz, 2H), 6.71 (s, 2H), 4.38 (t, *J* = 7.3 Hz, 2H), 2.88 (sept, *J* = 6.9 Hz, 2H), 1.98 (br quint, 2H), 1.38 (d, *J* = 6.9 Hz, 12H), 1.35-1.23 (m, 6H), 0.87 (t, *J* = 7.1 Hz, 3H); 13C-NMR (CDCl3, 62.5 MHz) ** 198.0, 182.7, 145.4, 128.0, 123.6, 123.2, 123.0, 110.1, 94.1, 44.0, 36.7, 31.4, 28.9, 26.8, 22.4, 19.6, 13.9; Anal. Calc. for C30H35B2F4NO4: C, 63.08, H, 6.18, N, 2.45. Found: C, 63.30; H, 6.20; N, 2.54.

**Two-Photon Measurements**

TPA spectra were determined by measurements of the two-photon induced fluorescence after excitation by 6ns pulses from an optical parametric oscillator1 and by 100fs pulses from a Ti:sapphire laser, as described previously.2,3 Calibration was performed against coumarin 307 in methanol4 (fs data), *p*-bis-(*o*-methylstyryl)benzene in cyclohexane5 ns, <700nm), and fluorescein4 (ns, >700nm). Fluorescence quantum yields were determined using a Spex Fluorlog 3 fluorometer; a non-deoxygenated solution of 9,10-diphenylanthracene in cyclohexane (** = 0.706) was used as a reference.

**Computational Methodology**

Calculations to model the two-photon absorption (TPA) spectra were performed for simplified analogues of **1**, **2** and **3** in which the alkyl chains were replaced by methyl groups (the nPr groups of **1** and **2**, the iPr groups of **3**, and the *n*-hexyl group of **3**) or hydrogen atoms (the *n*-pentyl groups in **2**). To calculate the (TPA) cross-sections, we applied the perturbative Sum-Over-States (SOS) approach7 including the coupling between the 300 lowest lying excited states. These were obtained via the highly correlated INDO8,9/MRDCI10 method with a properly scaled configuration interaction space and using the Mataga-Nishimoto potential11 to express the Coulomb repulsion term and relying on a molecular geometry calculated with the semiempirical AM1 Hamiltonian12 (details see e.g. Ref. 13). The damping factors entering the SOS expression for the various excited states were assumed to be equal and set to 0.1 eV in accordance with previous studies. To account for the much larger width of the TPA peaks experimentally observed for molecules **1** and **2**, the calculated TPA response for these molecules was convoluted with a Gaussian function, the width of which was chosen to yield the same full width at half maximum in the calculated and measured spectra (typically 0.175 eV). For molecule **3** slightly different TPA spectra were calculated for different molecular conformations (i.e., that shown in Scheme 1 and related to it by a rotation of 180˚ of one or both of the dioxaborine groups about the dioxaborine-carbazole bonds compared to Scheme 1); the values reported were obtained for the conformation depicted in Scheme 1.

**Silver Microfabrication in Nanocomposite Films**

Glass microscope slides (75  25 mm) were cleaned by sonication in water, ethanol and acetone and then rinsed with *iso*-propanol. Two-photon writing experiments were performed using a femtosecond mode-locked Ti:sapphire laser (Spectra Physics, Tsunami) pumped by a diode pumped YVO4 laser (Spectra Physics, Millennia). The average pulse length of the laser was 120 fs, 82 MHz and the wavelength used was 730 nm. The sample was mounted on a micropositioner (Sutter MP-285). The laser beam was focused on the sample using an inverted microscope (Nikon Eclipse TE300). A computer controlled both the micropositioner and a shutter (Newport 846HP). The combination of the micropositioner movements and the opening/closing of the shutter were synchronized to allow patterned exposures and metallic structures to be written in the sample. Microfabricated structures were imaged in-situ using two-photon scanning laser microscopy (Biorad MRC-1024 scanner/controller). Films were prepared by solvent evaporation under an inert atmosphere (Ar) saturated with solvent vapor. Evaporation of a mixture made from a chloroform solution of dye, silver nanoparticles, poly(*N*-vinylcarbazole) (PVK), and *N*-ethylcarbazole, and an acetonitrile solution of silver tetrafluoroborate, was used to cast the nanocomposite films.

As an example, a film used as a reference was prepared by dissolving 220 mg of PVK, 110 mg of N-ethylcarbazole, 11 mg *E,E*-3,5-bis[4-(formyl)styryl]-1,4-di(*n*-dodecoxy)benzene (see reference 14), and 2 mg of mixed ligand nanoparticles in 2 mL of deoxygenated chloroform, and stirring the solution for 24 hours. 240 mg of AgBF4 was dissolved in 1 mL of acetonitrile and 0.1 mL of this solution was added to the polymer solution. The combined solution was dropped onto the microscope slide and the solvent was allowed to evaporate in a small chamber filled with chloroform vapor. The vapor concentration and the chamber volume were chosen so that the solvent evaporated in approximately 6 to 8 hours.

The dioxaborine-containing films were fabricated in the same way, but with the concentration of the dye adjusted so that the film would have the same bulk TPA coefficient.

Threshold experiments were performed using a variable neutral density filter wheel. A pattern of ten parallel wires 100 m long and spaced10 m apart was microfabricated and was imaged using optical microscopy. The threshold was defined as the power needed to obtain at least five continuous wires under optical imaging.

**References**

1 M. Rumi, J. E. Ehrlich, A. A. Heikal, J. W. Perry, S. Barlow, Z. Hu, D. McCord-Maughon, H. Röckel, S. Thayumanavan, S. R. Marder, D. Beljonne, and J.-L. Brédas, *J. Am. Chem. Soc.*, 2000, **122**, 9500.

2 W. Wenseleers, F. Stellacci, T. Meyer-Friedrichsen, T. Mangel, S. R. Marder, and J. W. Perry, *J. Phys. Chem. B.*, 2002, **106**, 6853.

3 S. J. K. Pond, M. Rumi, M. D. Levin, T. C. Parker, D. Beljonne, M. W. Day, J. L. Bredas, S. R. Marder, and J. W. Perry, *J. Phys. Chem. A.*, 2002, **106**, 11470.

4 C. Xu and W. W. Webb, *J. Opt. Soc. Am.*, 1996, **B13**, 481.

5 S. M. Kennedy and F. E. Lytle, *Anal. Chem.*, 1986, **58**, 2643.

6 S. R. Meech and D. Phillips, *J Photochem.*, 1983, **23**, 193.

7 B. J. Orr and J. F. Ward, *Mol. Phys.*, 1971, **20**, 513.

8 J. A. Pople, D. L. Beveridge, and P. A. Dobosh, *J. Chem. Phys.*, 1967, **47**, 2026.

9 J. Ridley and M. Zerner, *Theor. Chim. Acta*, 1973, **32**, 111.

10 R. J. Buenker and S. D. Peyerimhoff, *Theor. Chim. Acta*, 1974, **35**, 33.

11 N. Mataga and K. Nishimoto, *Z. Phys. Chem.*, 1957, **13**, 140.

12 M. J. S. Dewar, E. G. Zoebisch, E. F. Healy, and J. J. P. Stewart, *J. Am. Chem. Soc.*, 1985, **107**, 3902.

13 E. Zojer, D. Beljonne, T. Kogej, H. Vogel, S. R. Marder, J. W. Perry, and J.-L. Brédas, *J. Chem. Phys.*, 2002, **116**, 3646.

14 F. Stellacci, C. A. Bauer, T. Meyer-Friedrichsen, W. Wenseleers, V. Alain, S. M. Kuebler, S. J. K. Pond, Y. Zhang, S. R. Marder, and J. W. Perry, *Adv. Mater.*, 2002, **14**, 194.
